# Supplementary figures and images for: Use of Secondary Metabolites of Wood-Decaying Fungi to Reduce Damping off Disease
Source: MDPI journal article supplement (doi:10.3390/f13081208), 2022-07-31

*Fomitopsis pinicola*

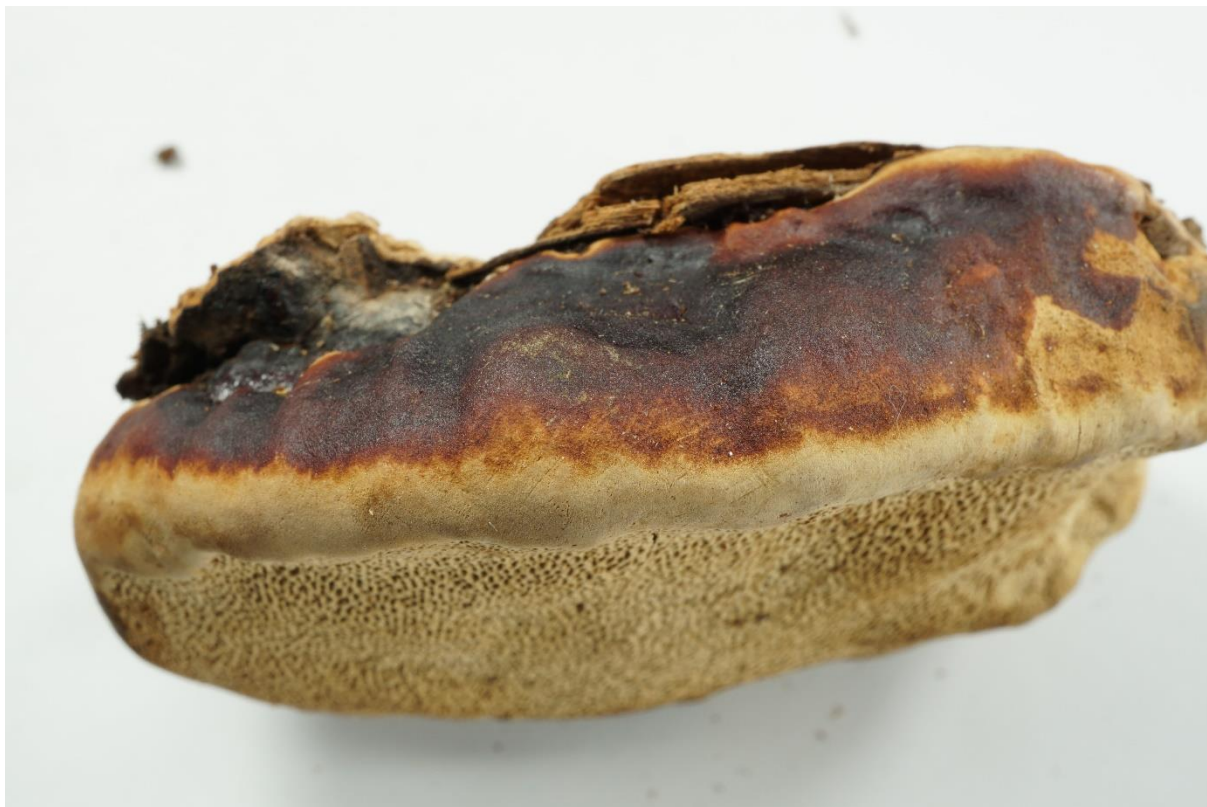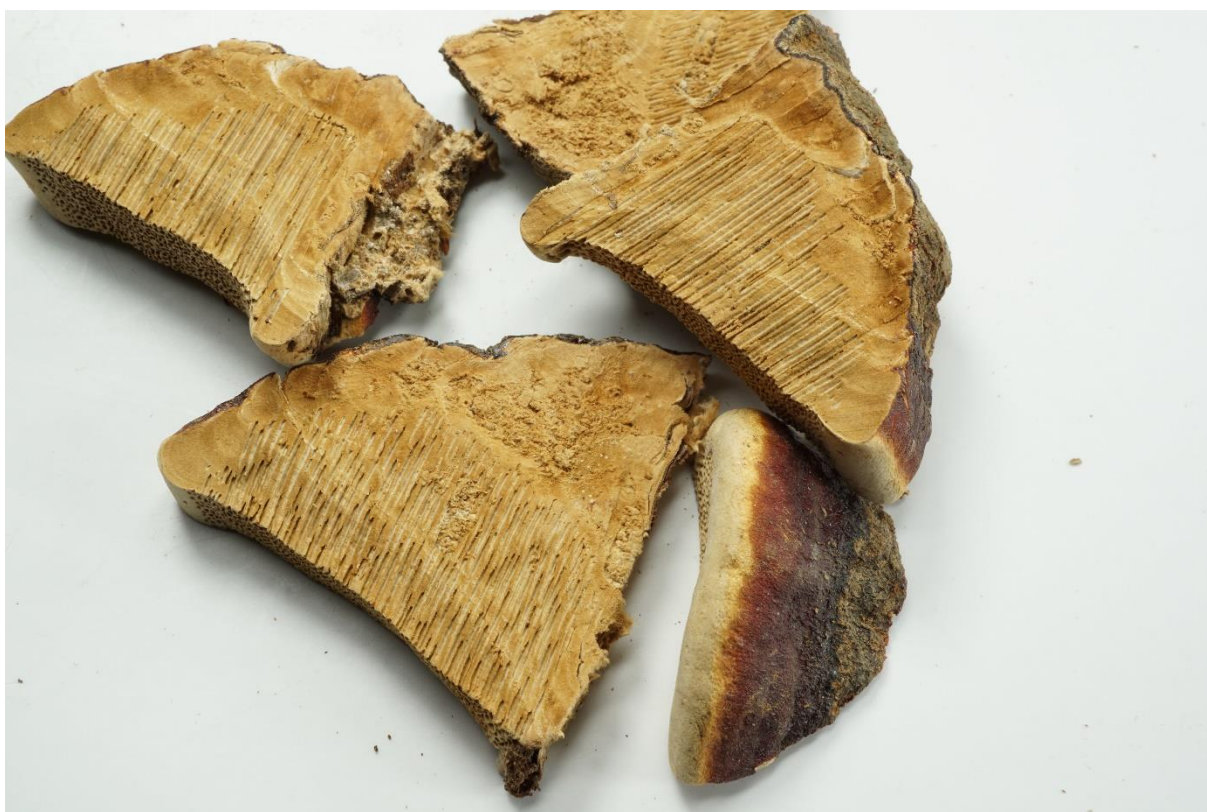



*Ganoderma applanatum*

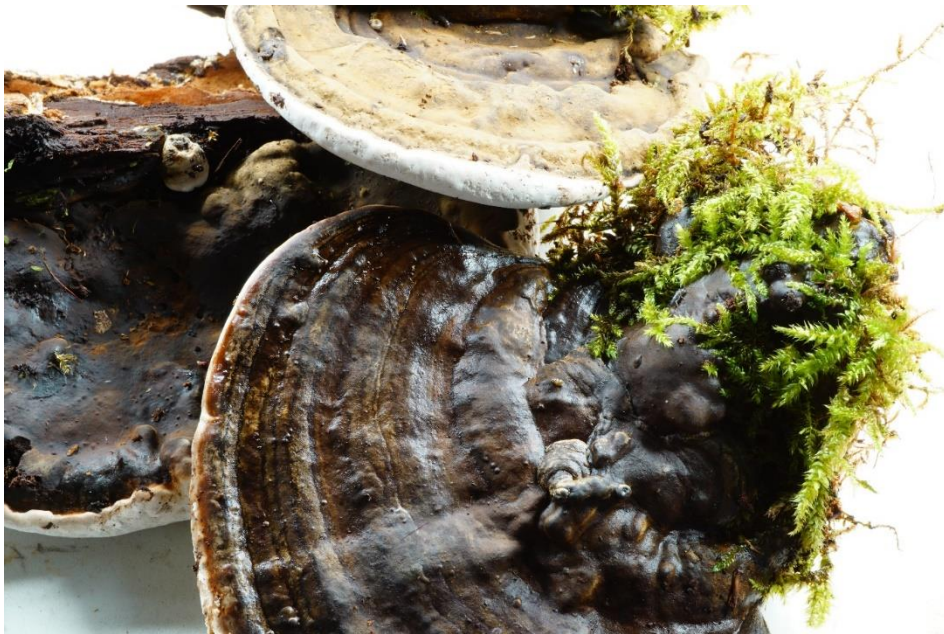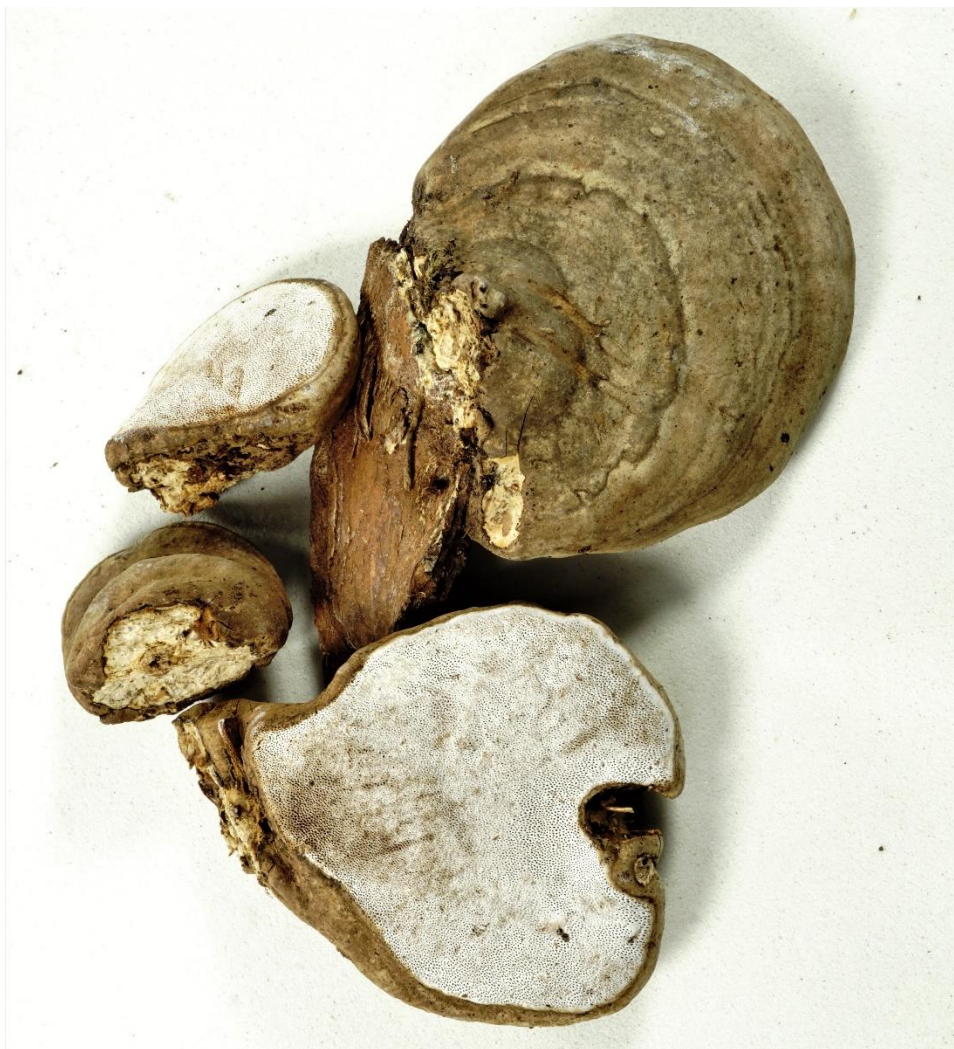

*Trametes versicolor*

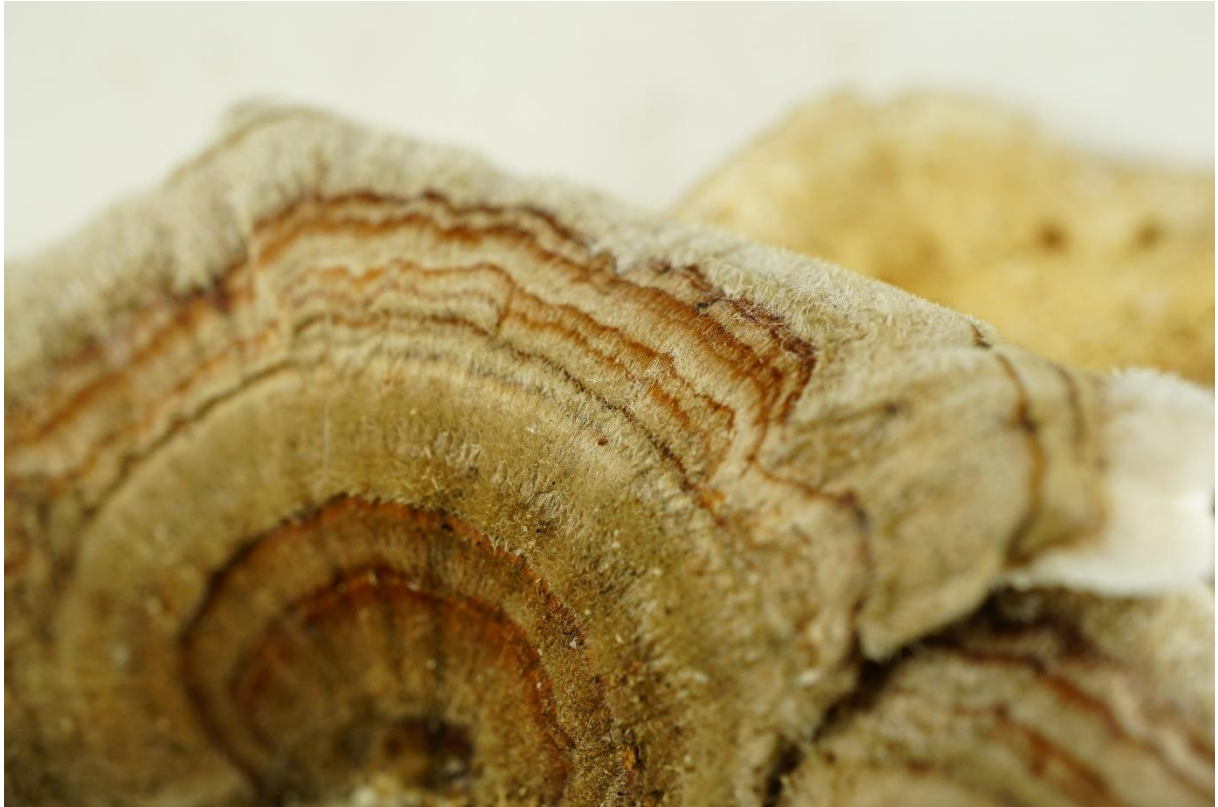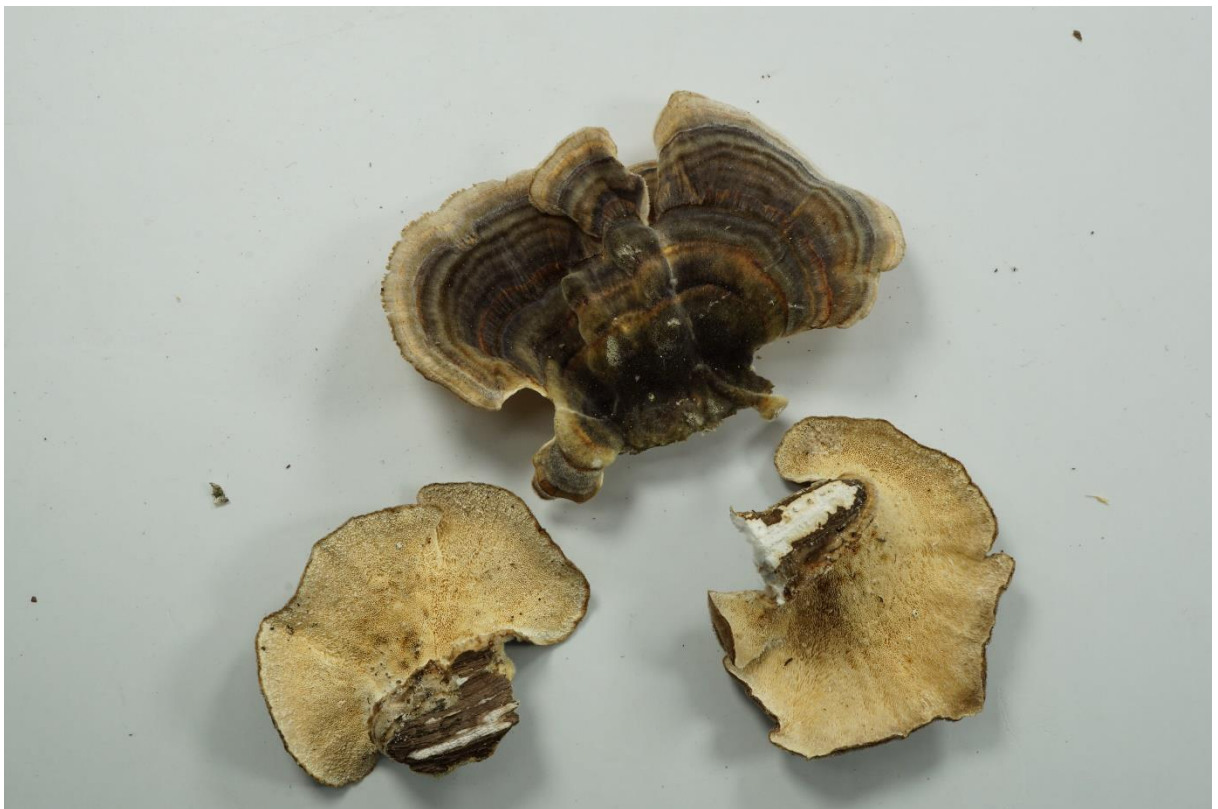

Supplement: s1 [file s1]
